# Supplementary material for: New volumetric CNT-doped gelatin–cellulose scaffolds for skeletal muscle tissue engineering
Source: PubMed Central journal article supplement — Nanoscale Adv. 2020 May 29;2(7):2885–96. doi: 10.1039/d0na00268b (PMC9418820; doi:10.1039/d0na00268b), 2020-05-29
Supplement: NA-002-D0NA00268B-s004.pdf [file NA-002-D0NA00268B-s004.pdf]

## New volumetric CNT-doped Gelatin-Cellulose scaffold for skeletal muscle tissue engineering

Ferran Velasco-Mallorquí, Juan M. Fernández-Costa, Luisa Neves and Javier Ramón-Azcón

### Supplementary Figures

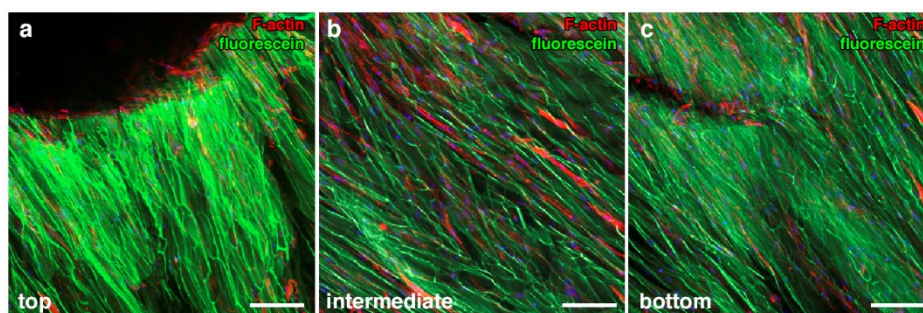

| Detph          | Number of Cells |
|----------------|-----------------|
| Top            | 284             |
| Intermediate 1 | 426             |
| Intermediate 2 | 291             |
| Intermediate 3 | 300             |
| Bottom         | 289             |

Figure S 1 Cells can colonize all the depth of the cryogel. (a – c) Confocal merged images showing aminofluorescein marked cryogel in green, cells marked with phalloidin in red and cell nuclei counterstained in blue with DAPI. Scale bars = 100  $\mu$ m. (d) Table with the nuclei quantification of 5 different depths among the whole cryogel.

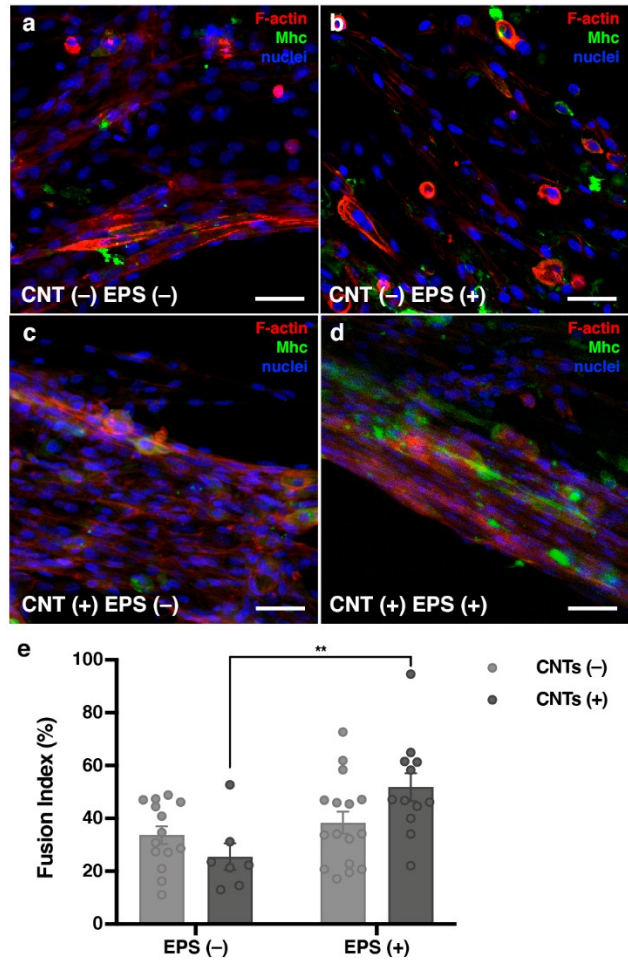

Figure S 2 Fusion index of all the conditions of the cryogel. (a – d) Confocal merged images showing cells marked with phalloidin in red, cell nuclei counterstained in blue with DAPI and Mhc marked with Alexa-488 in green. Scale bars = 100  $\mu$ m. (e) Graphs showing fusion index in all the possible cryogel conditions CNTs(+/-) and EPS(+/-). Results are mean  $\pm$  SEM. \* p-value = 0.05
