# Supplementary figures and images for: New volumetric CNT-doped gelatin–cellulose scaffolds for skeletal muscle tissue engineering
Source: PubMed Central journal article supplement — Nanoscale Adv. 2020 May 29;2(7):2885–96. doi: 10.1039/d0na00268b (PMC9418820; doi:10.1039/d0na00268b), 2020-05-29

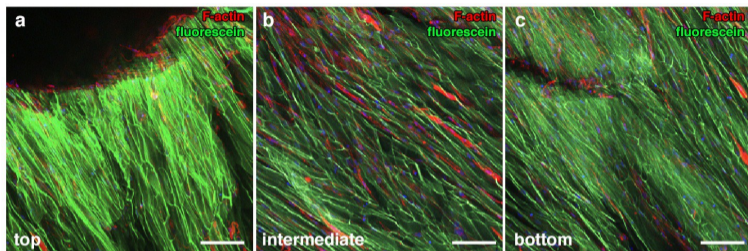

| Depth          | Number of Cells |
|----------------|-----------------|
| Top            | 284             |
| Intermediate 1 | 426             |
| Intermediate 2 | 291             |
| Intermediate 3 | 300             |
| Bottom         | 289             |

Supplement: NA-002-D0NA00268B-s002.pdf [file NA-002-D0NA00268B-s002.pdf]

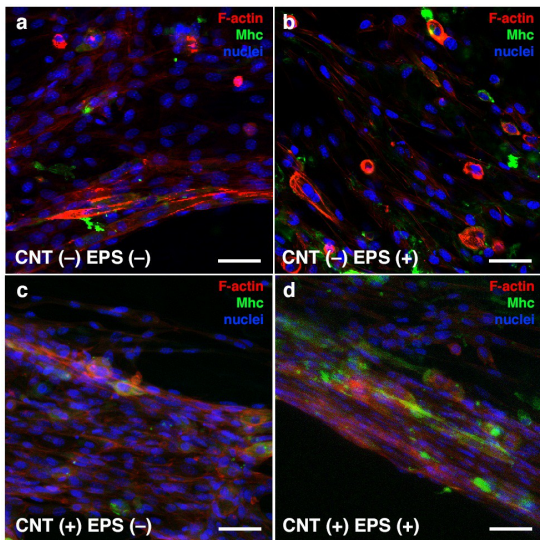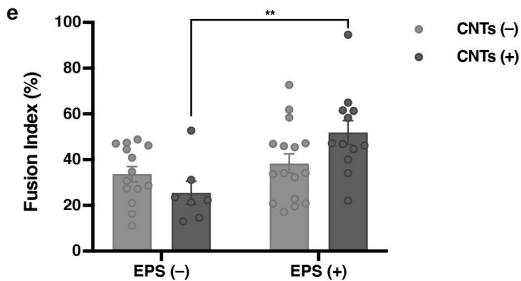

Supplement: NA-002-D0NA00268B-s003.pdf [file NA-002-D0NA00268B-s003.pdf]
